# Supplementary material for: Smart polymeric particle encapsulated gadolinium oxide and europium: theranostic probes for magnetic resonance/optical imaging and antitumor drug delivery
Source: Royal Society of Chemistry journal article supplement (doi:10.1039/c5tb02083b), 2015-12-29
Supplement: c5tb02083b1.pdf [file c5tb02083b1.pdf]

Electronic supplementary information

**Smart polymeric particles encapsulated gadolinium oxide and europium: Theranostic probe for magnetic resonance/optical imaging and antitumor drug delivery**

Ruiqing Liu<sup>a, 1</sup>, Shuang Liang<sup>b, 1</sup>, Cun Jiang<sup>a</sup>, Li Zhang<sup>a</sup>, Tianmeng Yuan<sup>a</sup>, Penghui Li<sup>c,d</sup>, Zushun Xu<sup>a</sup>, Haibo Xu<sup>b</sup>, and Paul K. Chu<sup>c</sup>

<sup>a</sup> Hubei Collaborative Innovation Center for Advanced Organic Chemical Materials, Ministry of Education Key Laboratory for the Green Preparation and Application of Functional Materials, Hubei University, Wuhan 430062, Hubei, China. E-mail: zushunxu@hubu.edu.cn

<sup>b</sup> Department of Radiology, Union Hospital, Tongji Medical College, Huazhong University of Science and Technology, Wuhan 430030, Hubei, China. E-mail: xuhaibo1120@hotmail.com

<sup>c</sup> Department of Physics and Materials Science, City University of Hong Kong, Tat Chee Avenue, Kowloon, Hong Kong, China. E-mail: paul.chu@cityu.edu.hk

<sup>d</sup> Institute of Biomedicine and Biotechnology, Shenzhen Institutes of Advanced Technology, Chinese Academy of Sciences, Shenzhen 518055, China.

<sup>1</sup> These two authors contributed equally to this work.

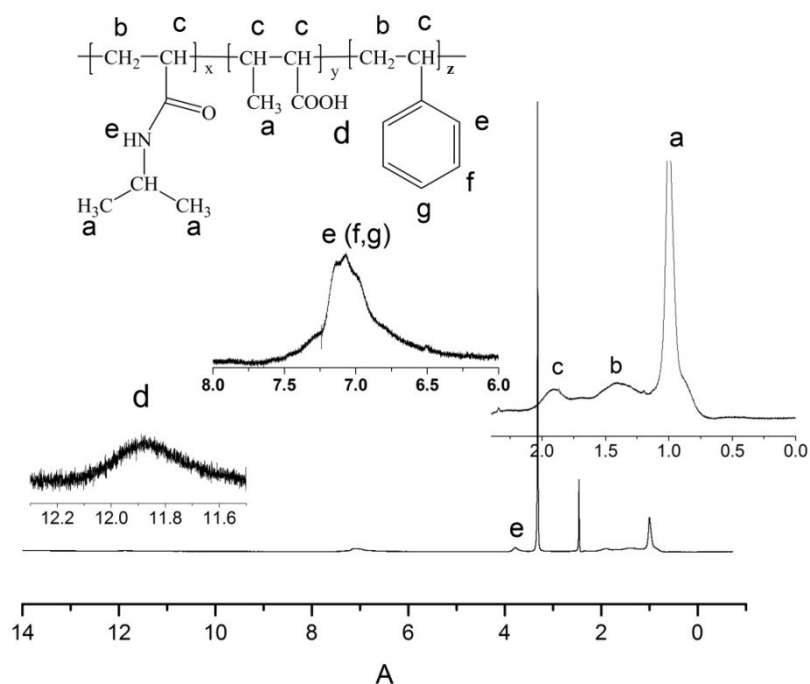

**Fig. S1.** <sup>1</sup>H-NMR spectrum of TPPs. <sup>1</sup>H NMR  $\delta_H$ /ppm (600 MHz, DMSO-d<sub>6</sub>): 1.00 (-CH<sub>3</sub>), 1.36 (-CH<sub>2</sub>-), 1.87(-CH-), 3.78 (-NH-), 7.00-7.18( $\square$ ), 11.86(-COOH).

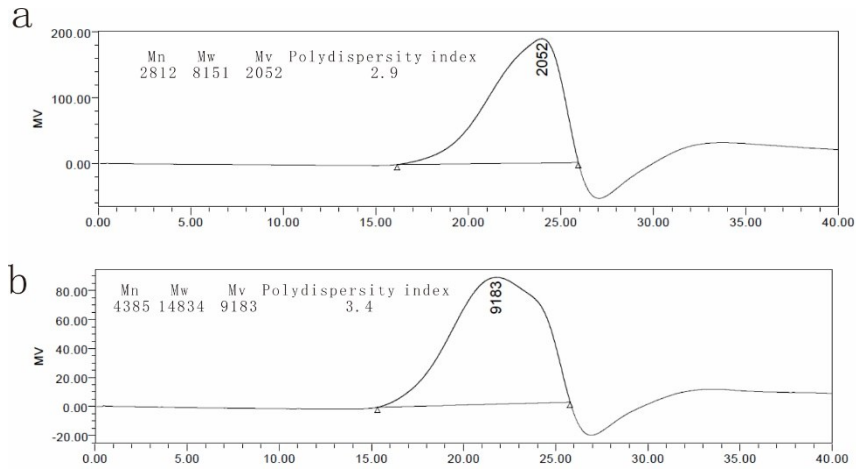

**Fig. S2** Typical GPC curve of (a) TPPs and (b) PLTPPs.

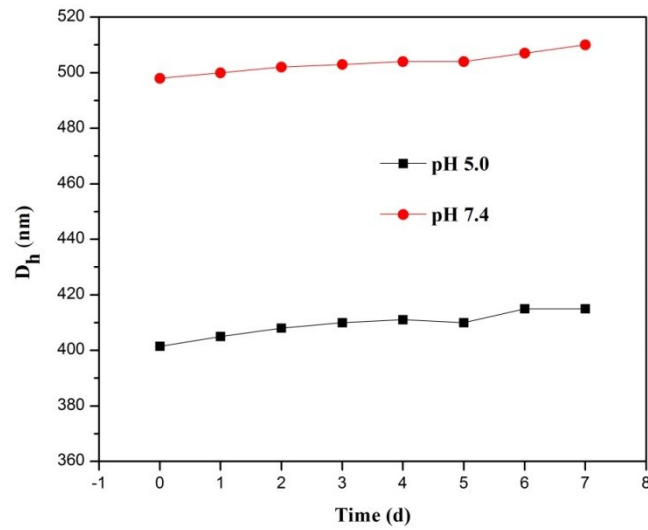

**Fig. S3** The  $D_h$  of the PLTPPs dialyzed against tris-buffer (0.01M) at 37 °C. The  $D_h$  are all exhibited as average values repeated for three times, and both of their polydispersity index (PDI) are lower than 0.1.

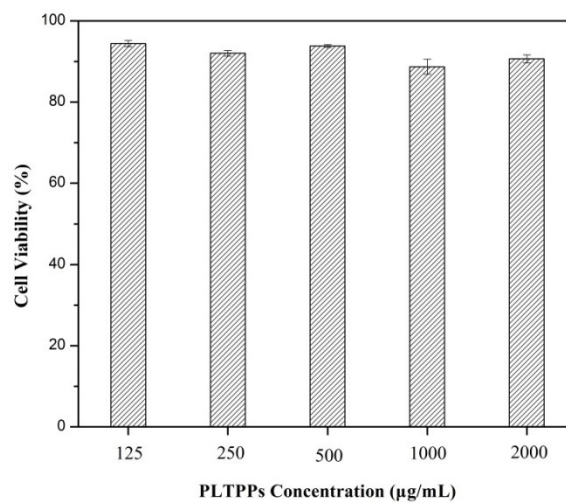

**Fig. S4.** Cell viability against H22 cells assessed by MTT assay.

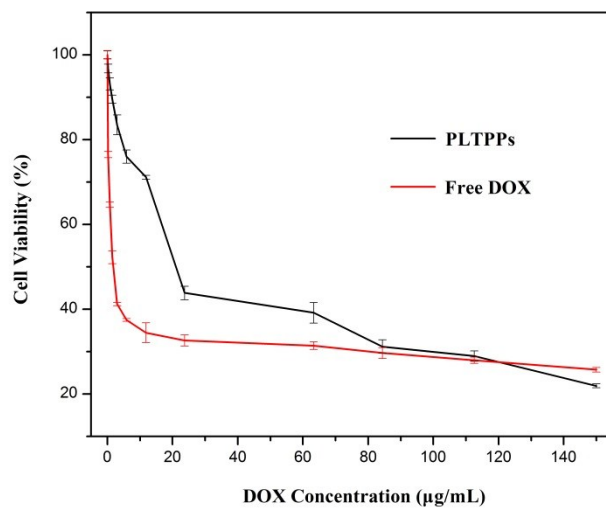

**Fig. S5.** Antitumor activity of DOX-loaded PLTPPs against H22 cells *via* the cell viability assay with free DOX as the control.

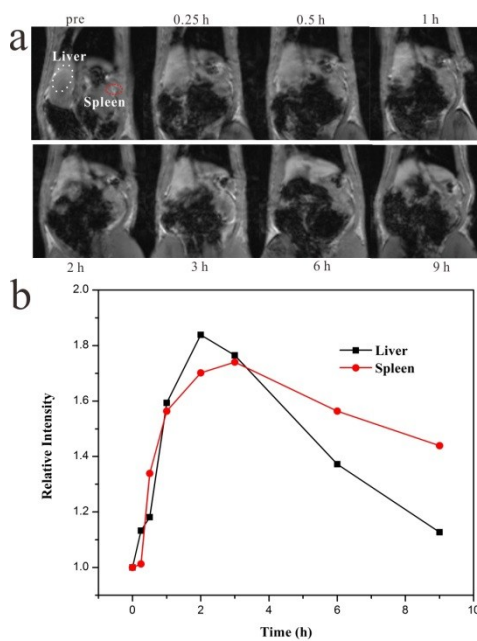

**Fig. S6.** (a)  $T_1$ -weighted SD rats MR images taken at time points of 0, 0.25, 0.5, 1, 2, 3, 6, and 9 h and (b) relative SI of liver and spleen.
